# Supplementary material for: Crystal Structure of Dimeric Flavodoxin from Desulfovibrio gigas Suggests a Potential Binding Region for the Electron-Transferring Partner
Source: Int J Mol Sci. 2013 Jan 15;14(1):1667–83. doi: 10.3390/ijms14011667 (PMC3565340; doi:10.3390/ijms14011667)

## Supplementary Information

**Figure S1.** The sequence alignment of selected *Desulfovibrio* sp. The blue and black boxes indicate the residues involved in the negatively charged surface and the dimeric interface, respectively.

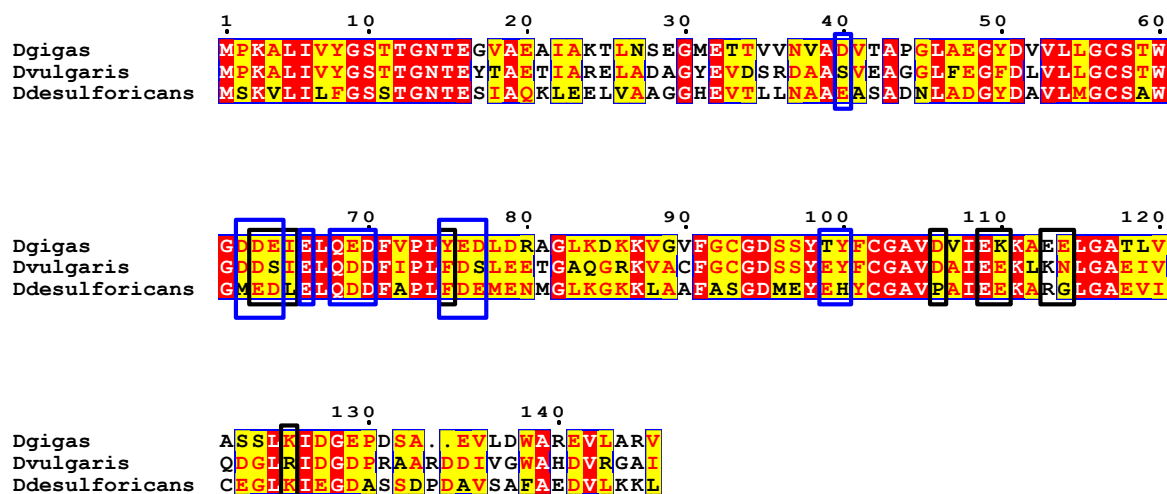

**Figure S2.** The calculation of the molecular weight by gel filtration. The calculated molecular weight of Fld is ~26 kDa by gel filtration through superdex-G75, which is the twice monomeric molecular weight (15 kDa). Standard materials: Aldolase (158 kDa), Ovalbumin (44 kDa), Ribonuclease (13.7 kDa), Aprotinin (6 kDa).

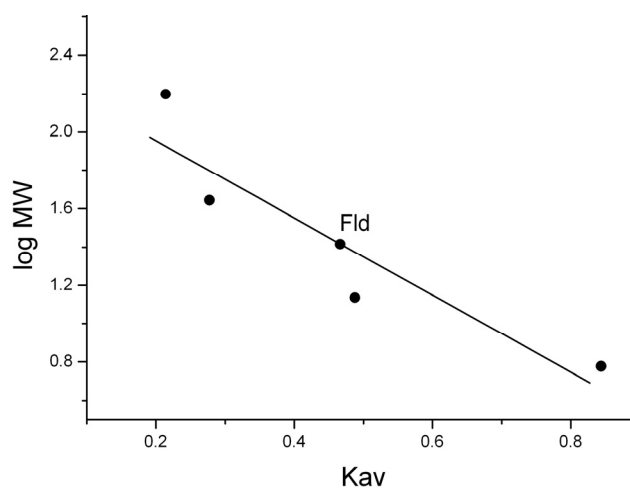

Supplement: Supplementary file 1 [file ijms-14-01667-s001.pdf]
